# Supplementary material for: Integration of Stem Cell to Chondrocyte-Derived Cartilage Matrix in Healthy and Osteoarthritic States in the Presence of Hydroxyapatite Nanoparticles
Source: PLoS One. 2016 Feb 12;11(2):e0149121. doi: 10.1371/journal.pone.0149121 (PMC4752260; doi:10.1371/journal.pone.0149121)
Supplement: S6 File — (XLSX) [file pone.0149121.s006.xlsx]

## Sheet: Agar HCOA PEGDA BMSC interface
Run 1	Cт Mean	ΔCт Mean	Copy Number			Aggrecan	0.00685232
GAPDH	29.8911	0	1				0.00601871
Aggregan	37.0803	7.18919	0.00685232				0.0065055
SOX 9	34.9231	5.03208	0.0305628
Collagen 2	37.4837	7.59263	0.00518072			SOX9	0.0305628
MMP 13	34.5461	4.65505	0.0396907				0.0245635
Runx2	32.8458	2.95471	0.128986				0.0162545
Collagen X	36.0885	6.19748	0.0136261
Type 1	30.9866	1.09552	0.467967			Collagen 2	0.00518072
osteocalcin	33.5603	3.66928	0.0786028				0.00928043
							0.00750262
Run 2	Cт Mean	ΔCт Mean	Copy Number
GAPDH	29.7914	0	1			MMP13	0.0396907
Aggregan	37.1678	7.37633	0.00601871				0.0331413
SOX 9	35.1388	5.34734	0.0245635				0.0633696
Collagen 2	36.543	6.75159	0.00928043
MMP 13	34.7066	4.91523	0.0331413			Runx2	0.128986
Runx2	32.7829	2.99149	0.125739				0.125739
Collagen X	35.7794	5.98803	0.0157552				0.105097
Type 1	30.9054	1.11398	0.462018
osteocalcin	35.7462	5.95478	0.0161225			Collagen X	0.0136261
							0.0157552
Run 3	Cт Mean	ΔCт Mean	Copy Number				0.0113425
GAPDH	29.8911	0	1
Aggregan	37.1552	7.26412	0.0065055			Type 1	0.467967
SOX 9	35.8341	5.94301	0.0162545				0.462018
Collagen 2	36.9495	7.05839	0.00750262				0.482843
MMP 13	33.8711	3.98007	0.0633696
Runx2	33.1413	3.2502	0.105097			Osteocalcin	0.0786028
Collagen X	36.3532	6.46212	0.0113425				0.0161225
Type 1	30.9414	1.05037	0.482843				0.0205754
osteocalcin	35.494	5.60293	0.0205754
Average	Copy number	SD
GAPDH	1	0
Aggrecan	0.00645884	0.000418758
SOX 9	0.0237936	0.00718514
Collagen II	0.00732126	0.00205586
MMP 13	0.0454005	0.0159025
Runx2	0.119941	0.012957
Collagen X	0.0135746	0.00220681
Type 1 Collagen	0.470943	0.0107264
Osteocalcin	0.0384336	0.0348587

## Sheet: Agar HCOA PEGDA BMSC upper
Run 1	Cт Mean	ΔCт Mean	Copy Number			Aggrecan	0.0673505
GAPDH	30.8218	0	1				0.0990262
Aggregan	34.714	3.89217	0.0673505				0.460114
SOX 9	35.7461	4.92431	0.0329334
Collagen 2	34.5214	3.69958	0.0769688			SOX9	0.0329334
MMP 13	38.7829	7.96109	0.00401304				0.0265604
Runx2	36.9236	6.1018	0.0145605				0.0245567
Collagen X	38.9829	8.16109	0.00349356
Type 1	32.7829	1.96109	0.256835			Collagen 2	0.0769688
osteocalcin	37.0751	6.25325	0.0131094				0.0784772
							0.0245567
Run 2	Cт Mean	ΔCт Mean	Copy Number
GAPDH	27.9067	0	1			MMP13	0.00401304
Aggregan	31.2427	3.33605	0.0990262				0.00143723
SOX 9	33.1413	5.23458	0.0265604				0.00617397
Collagen 2	31.5783	3.67158	0.0784772
MMP 13	37.3492	9.44249	0.00143723			Runx2	0.0145605
Runx2	33.0878	5.18108	0.0275639				0.0275639
Collagen X	37.1552	9.2485	0.00164408				0.017774
Type 1	30.1841	2.27744	0.206263
osteocalcin	34.1724	6.26571	0.0129967			Collagen X	0.00349356
							0.00164408
Run 3	Cт Mean	ΔCт Mean	Copy Number				0.0021303
GAPDH	29.8911	0	1
Aggregan	31.011	1.11994	0.460114			Type 1	0.256835
SOX 9	35.2388	5.34774	0.0245567				0.206263
Collagen 2	35.2388	5.34774	0.0245567				0.498833
MMP 13	37.2306	7.33959	0.00617397
Runx2	35.7052	5.81409	0.017774			Osteocalcin	0.0131094
Collagen X	38.7658	8.87473	0.0021303				0.0129967
Type 1	30.8944	1.00337	0.498833				0.0106439
osteocalcin	36.4449	6.55383	0.0106439
Average	Copy number	SD
GAPDH	1	0
Aggregan	0.20883	0.218193
SOX 9	0.0280168	0.00437413
Collagen 2	0.0600009	0.0307048
MMP 13	0.00387475	0.0023714
Runx2	0.0199661	0.00677322
Collagen X	0.00242265	0.000958768
Type 1 Collagen	0.320644	0.156374
osteocalcin	0.01225	0.00139209

## Sheet: Agar HCOA PHA BMSC interface
Run 1	Cт Mean	ΔCт Mean	Copy Number			Aggrecan	0.12535
GAPDH	29.9696	0	1				0.0781379
Aggregan	32.9656	2.99597	0.12535				0.130371
SOX 9	35.5384	5.56879	0.0210681
Collagen 2	36.0594	6.08981	0.0146819			SOX9	0.0210681
MMP 13	35.7624	5.79282	0.018038				0.0371427
Runx2	32.0396	2.07	0.238159				0.0135207
Collagen X	32.0136	2.04399	0.242493
Type 1	43	13.0304	0.000119527			Collagen 2	0.0146819
osteocalcin	37.2329	7.26324	0.00650947				0.0381106
							0.0441511
Run 2	Cт Mean	ΔCт Mean	Copy Number
GAPDH	25.1686	0	1			MMP13	0.018038
Aggregan	28.8464	3.67783	0.0781379				0.0264619
SOX 9	29.9193	4.75078	0.0371427				0.0619718
Collagen 2	29.8822	4.71367	0.0381106
MMP 13	30.4085	5.23994	0.0264619			Runx2	0.238159
Runx2	27.9067	2.73812	0.14988				0.14988
Collagen X	27.9961	2.82756	0.140871				0.34715
Type 1	37.0125	11.8439	0.000272034
osteocalcin	33.631	8.46247	0.00283493			Collagen X	0.242493
							0.140871
Run 3	Cт Mean	ΔCт Mean	Copy Number				0.235039
GAPDH	25.9071	0	1
Aggregan	28.8464	2.9393	0.130371			Type 1	0.000119527
SOX 9	32.1158	6.20868	0.0135207				0.000272034
Collagen 2	30.4085	4.50141	0.0441511				0.000671242
MMP 13	29.9193	4.01224	0.0619718
Runx2	27.4335	1.52637	0.34715			Osteocalcin	0.00650947
Collagen X	27.9961	2.08903	0.235039				0.00283493
Type 1	36.448	10.5409	0.000671242				0.00159018
osteocalcin	35.2037	9.2966	0.00159018
Average	Copy number	SD
GAPDH	1	0
Aggregan	0.111286	0.0288169
SOX 9	0.0239105	0.0120648
Collagen II	0.0323145	0.0155661
MMP 13	0.0354906	0.023317
Runx2	0.245063	0.0988162
Collagen X	0.206134	0.0566427
Type 1	0.000354267	0.000284902
osteocalcin	0.00364486	0.0025577

## Sheet: Agar HCOA PHA BMSC upper
Run 1	Cт Mean	ΔCт Mean	Copy Number			Aggrecan	0.410351	0.410351	0.289097	0.26379
GAPDH	29.9845	0	1				0.289097	0.0368203	0.0178402	0.056091
Aggregan	31.2696	1.28507	0.410351				0.26379	0.137617	0.078656	0.12925
SOX 9	34.7479	4.76335	0.0368203					0	0	0
Collagen 2	32.8458	2.86127	0.137617			SOX9	0.0368203	0	0	0
MMP 13	undetermined	#VALUE!	0				0.0178402	0	3.2168e-05	0
Runx2	undetermined	#VALUE!	0				0.056091	0	0	0
Collagen X	undetermined	#VALUE!	0					0.00675526	0.00456219	0.00262792
Type 1	undetermined	#VALUE!	0			Collagen 2	0.137617
osteocalcin	37.1943	7.20977	0.00675526				0.078656
							0.12925
Run 2	Cт Mean	ΔCт Mean	Copy Number
GAPDH	10.4651	0	1			MMP13	0
Aggregan	12.2554	1.79037	0.289097				0
SOX 9	16.2738	5.80872	0.0178402				0
Collagen 2	14.1334	3.6683	0.078656
MMP 13	undetermined	#VALUE!	0			Runx2	0
Runx2	undetermined	#VALUE!	0				0
Collagen X	25.3891	14.924	3.2168e-05				0
Type 1	undetermined	#VALUE!	0
osteocalcin	18.2411	7.77606	0.00456219			Collagen X	0
							3.2168e-05
Run 3	Cт Mean	ΔCт Mean	Copy Number				0
GAPDH	27.9597	0	1
Aggregan	29.8822	1.92254	0.26379			Type 1	0
SOX 9	32.1158	4.15609	0.056091				0
Collagen 2	30.9115	2.95176	0.12925				0
MMP 13	undetermined	#VALUE!	0
Runx2	undetermined	#VALUE!	0			Osteocalcin	0.00675526
Collagen X	undetermined	#VALUE!	0				0.00456219
Type 1	undetermined	#VALUE!	0				0.00262792
osteocalcin	36.5316	8.57187	0.00262792
Average	Copy number	SD
GAPDH	1	0
Aggregan	0.321079	0.07834
SOX 9	0.0369172	0.0191256
Collagen 2	0.115175	0.0319015
MMP 13	0	0
Runx2	0	0
Collagen X	1.07227e-05	0
Type 1	0	0
osteocalcin	0.00464846	0.00206503
